# Supplementary material for: Predictors of functional status and disability among patients living with chronic kidney diseases at St Paul’s hospital millennium Medical College, Ethiopia; findings from a cross-sectional study
Source: Research Square preprint supplement (doi:10.21203/rs.3.rs-3282603/v1), 2023-09-25
Supplement: Supplementary file 1 [file 34899ae9536ca7fb6dae4229.docx]

**Predictors of functional status and disability among patients living with chronic kidney diseases at St Paul’s hospital millennium Medical College, Addis Ababa Ethiopia. Institution based cross-sectional study**

|  | | **Item no** | | **Recommendation** |
| --- | --- | --- | --- | --- |
| **Title and abstract** | | 1 | | 1. Study design is indicated in the abstract, methods section as an institution based cross-sectional study design. |
| (b) Methods and results section of the abstract provides a fair summary of the work that was done and the results that were discovered. |
| **Introduction** | | | | |
| Background/rationale | | 2 | | The scientific background and rationale for conducting this study is reported under background section in this manuscript. |
| Objectives | | 3 | | Specific objectives and the need for this study are stated in the last paragraph under background section. |
| **Methods** | | | | |
| Study design | | 4 | | This study used institution based cross-sectional design and the same is mentioned in 3rd paragraph of method section. |
| Setting | | 5 | | A detailed description of the study area, sample catchment area, location was described in the 1st paragraph of method section. Population attendance in the institution, participant and study period described in the 2nd paragraph of method section under. |
| Participants | | 6 | | Eligibility criteria of the study participants are clearly stated in the last paragraph of methods section. |
| Variables | | 7 | | Major outcome (health assessment questionnaire (HAQ-) disability index (DI)) and predictor variables are operationally defined and mentioned under data collection tools and procedures, in the 1st and 2nd paragraph. |
| Data sources/ measurement | | 8 | | Source of data and data analysis methods are discussed in the 1st and 2nd paragraphs of data processing and analysis section. |
| Bias | | 9 | | Several sections of the methods part described efforts to address possible bias sources. |
| Study size | | 10 | | Sample size determination, assumptions, and sampling technique are mentioned under sample size and sampling technique sub-section under methods. |
| Quantitative variables | | 11 | | All quantitative variables treated as qualitative after categorizing them in one of most commonly used categories and category used are mentioned under data processing and analysis sub-section. |
| Statistical methods | | 12 | | (*a*) Statistical methods used in this study are described under data analysis sub-section in the 2nd paragraph of data processing and analysis section. |
| (*b*) Both sub group analysis and interaction terms were used. |
| (*c*) There were no missing data in this study |
| *(d)* Not applicable |
| (*e*) Not applicable |
| **Results** | | | | |
| Participants | 13 | | (a) Number of study participant (CKD patients), response rate and reasons for non-response are presented in the first paragraph of results session and detail socio-demographic and behavioral characteristics in the table 1 and text under results and Clinical characteristics were presented in table 2 and text under Clinical characteristics sub section of the result section. | |
| (b) the most common reason for non-response was, not interested, feeling tiresome, and constrain of time. | |
| (c) This was cross-sectional study so; there is no flow as that of longitudinal study. | |
| **Descriptive** **data** | 14 | | (a) Characteristics of study participants (eg demographic,) and information on exposures and potential confounders is presented in tables 1. | |
| (b) There were no missing data in this study | |
| Outcome data | 15 | | Outcome variable (Health assessment questionnaire (HAQ-) disability index (DI) (>0 – 0.5, >0.5) described and summarized in table 2. | |
| **Main results** | 16 | | (*a*) Unadjusted estimates and confounder-adjusted estimates and their precision (e.g., 95% confidence interval) are presented in table 3. Discussed in 1stparagraph under regression analysis of result section. | |
| 1. Category boundaries of continuous variables were categorized and reported in all tables. | |
| (*c*) Regression model was used and expressed in odds ratio. | |
| Other analyses | 17 | |  | |
| **Discussion** | | | | |
| Key results | 18 | | Key results to study objectives are discussed under discussion session with references. | |
| Limitations | 19 | | Limitations and possible strengths related to this study are discussed in the final paragraph of discussion session on the way of viewing direction for researchers. | |
| Interpretation | 20 | | A cautious overall interpretation of results considering objectives, results from similar studies, and other relevant evidence is discussed under limitation of discussion session. | |
| Generalizability | 21 | | Generalizability (external validity) of the study results are mentioned in the paragraph of discussion section and in conclusion section. | |
| **Other information** | | | | |
| Funding | 22 | | Information regarding the source of funding **(Mekelle university)** and the role of the funders for the present study is mentioned under acknowledgment section. | |
